# Supplementary material
Source: publisher figshare collection journal article supplement (https://acs.figshare.com/ndownloader/files/9812260)
Supplement: Supplementary file 1 [file 9812260]

## Supporting Information

### **Methanol Oxidation to Formate on ALD Prepared VO<sub>x</sub>/θ-Al<sub>2</sub>O<sub>3</sub> Catalysts: a Mechanistic Study**

Wenqiang Wu,<sup>†</sup> Kunlun Ding,<sup>‡</sup> Jian Liu,<sup>‡</sup> Tasha Drake,<sup>†‡</sup> Peter Stair<sup>†‡</sup> and Eric Weitz<sup>†‡\*</sup>

<sup>†</sup>Institute for Catalysis in Energy Processes and Center for Catalysis and Surface Science

<sup>‡</sup>Department of Chemistry, Northwestern University, IL, 60208

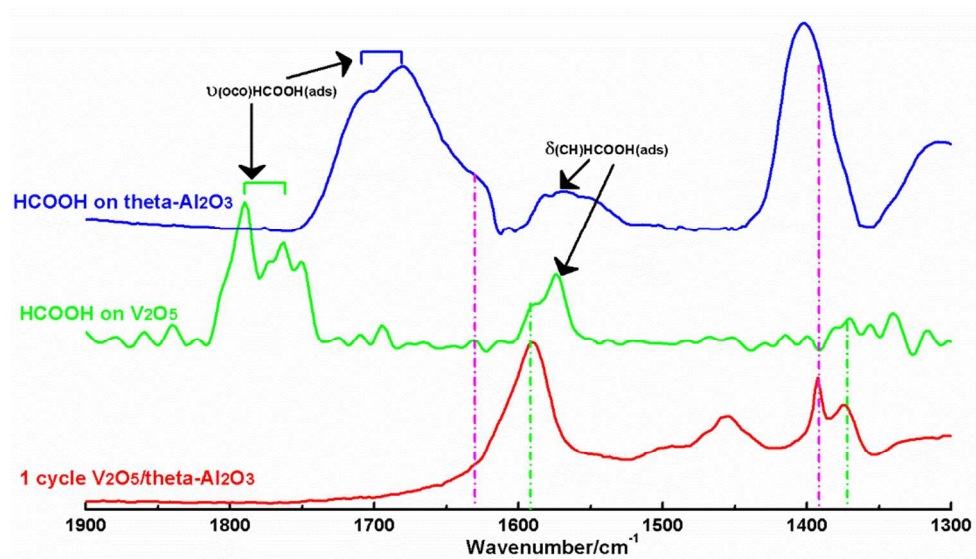

Figure S1. FTIR spectra of formic acid adsorbed on  $\theta\text{-Al}_2\text{O}_3$  and  $\text{V}_2\text{O}_5$ .

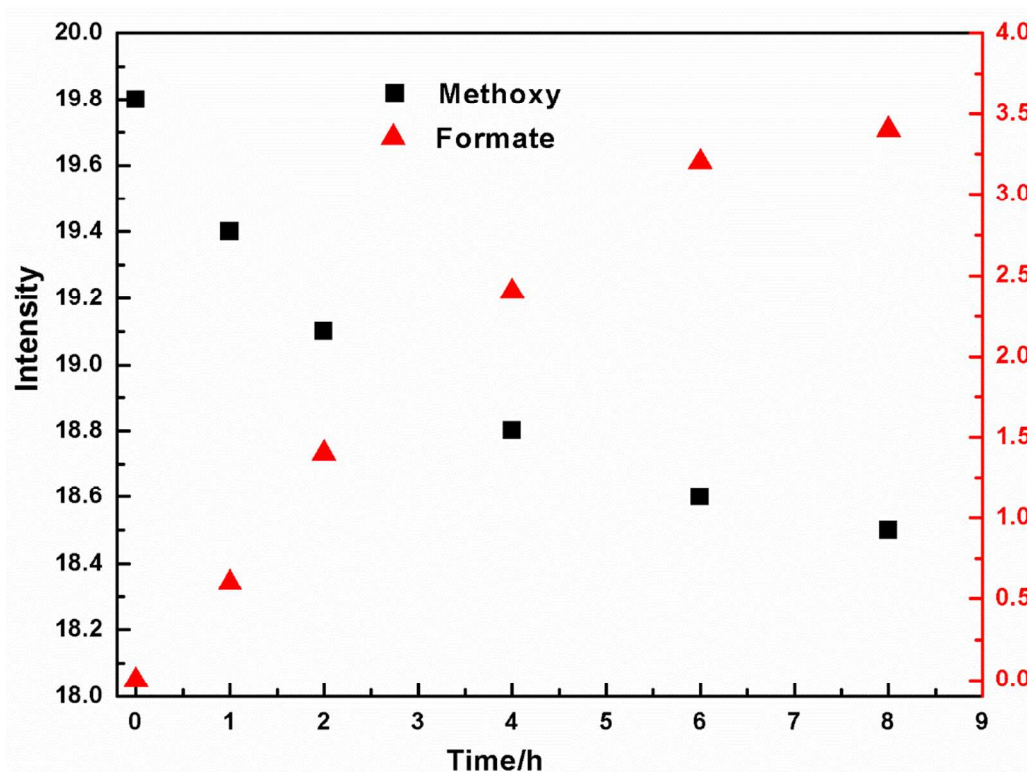

Figure S2. A plot of the integrals of the absorption of formates and methoxy on 1c  $\text{VO}_x/\theta\text{-Al}_2\text{O}_3$  (0.48 wt%) versus time at 200 °C. The formate absorption centered at  $\sim 1590\text{ cm}^{-1}$  was integrated to obtain the indicated format “intensity”. The indicated methoxy intensity was obtained from an integration of a portion of a deconvolution of the C-H stretching region. The peak that was integrated is centered at  $2940\text{ cm}^{-1}$  and is shown in Figure S3.

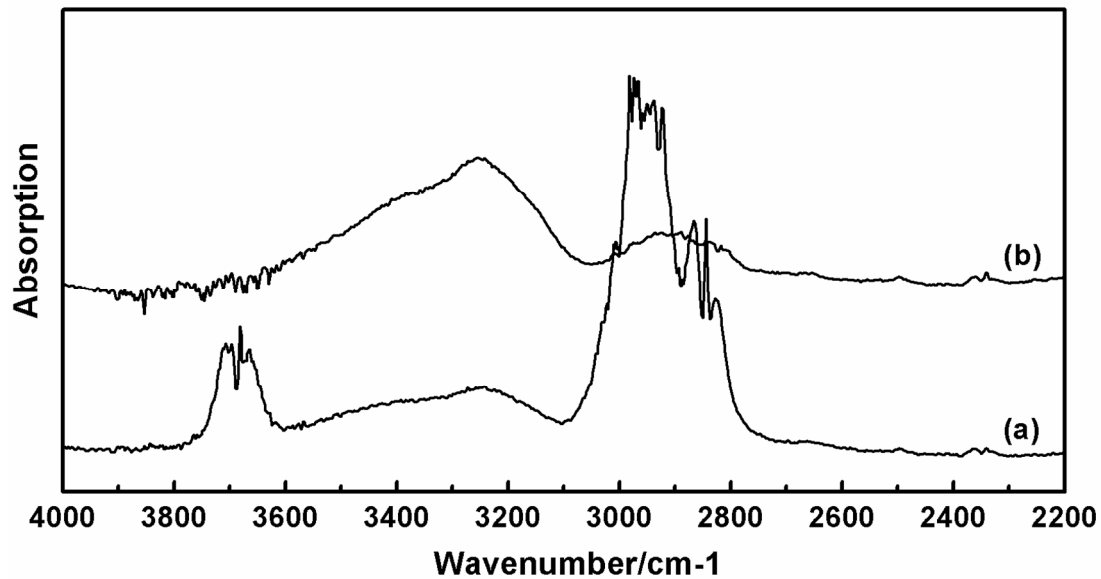

Figure S3. *In-situ* FTIR spectra of methanol on  $\theta$ -Al<sub>2</sub>O<sub>3</sub>, (a), after dosing with gas phase methanol for 5 min at 110 °C; (b) after subsequent evacuation for 30 min at 200 °C.

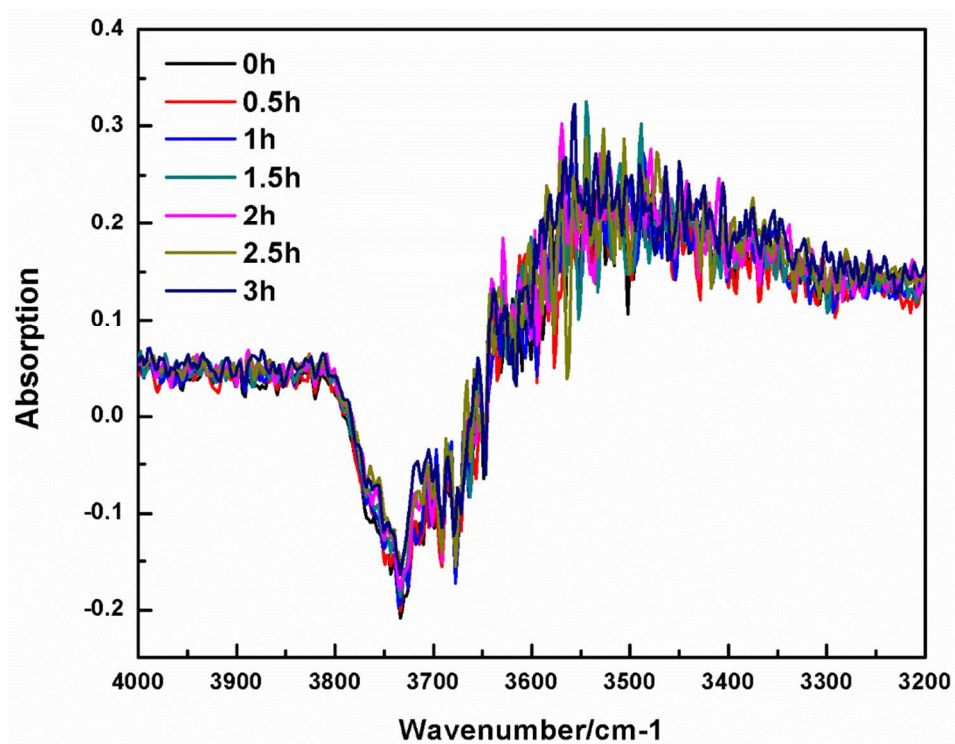

Figure S4. *In-situ* FTIR spectra of methanol on 1c VO<sub>x</sub>/θ-Al<sub>2</sub>O<sub>3</sub> in the OH stretch region at 200 °C.

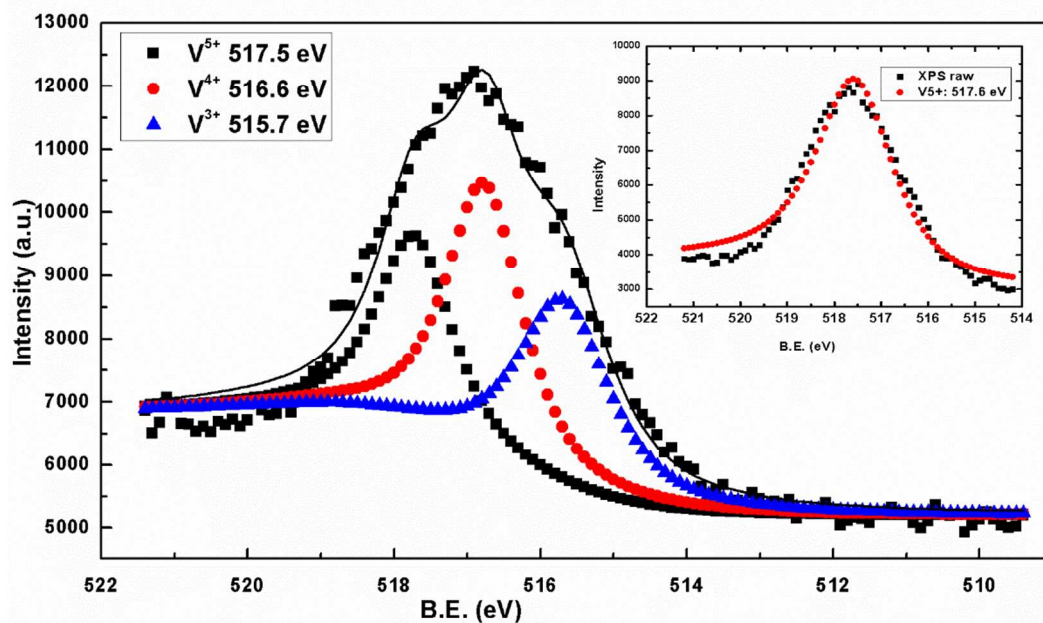

Figure S5. Deconvolution of the fit of the V 2p<sub>3/2</sub> signal from 1c VO<sub>x</sub>/θ-Al<sub>2</sub>O<sub>3</sub> (0.48 wt%) after reduction with 20 Torr of H<sub>2</sub> at 350 °C for 3 hours and oxidation at 350 °C with 20 Torr of O<sub>2</sub> for 3 hours. All of the hydrogen was carefully removed by pumping on the system before any oxygen was introduced into the system.

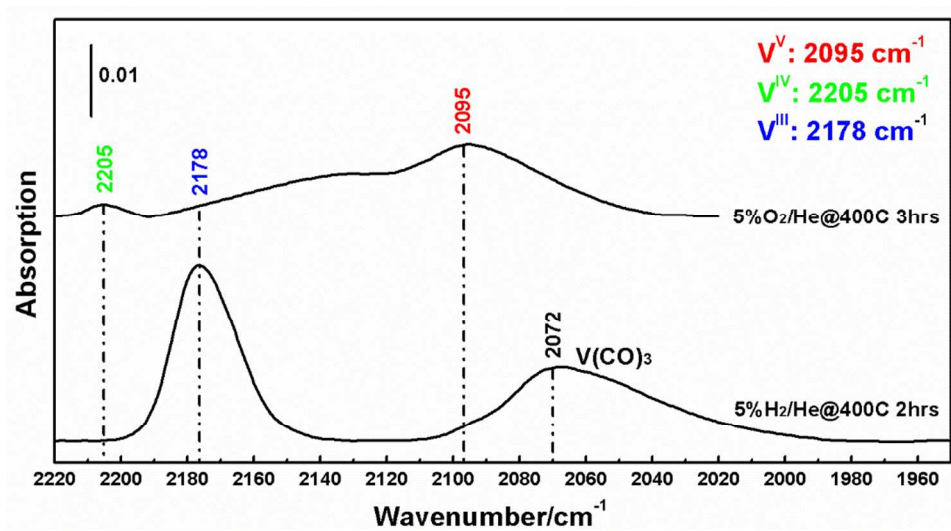

Figure S6. *In-situ* FTIR spectra of CO adsorption on oxidized and then reduced 1c VO<sub>x</sub>/Al<sub>2</sub>O<sub>3</sub>.

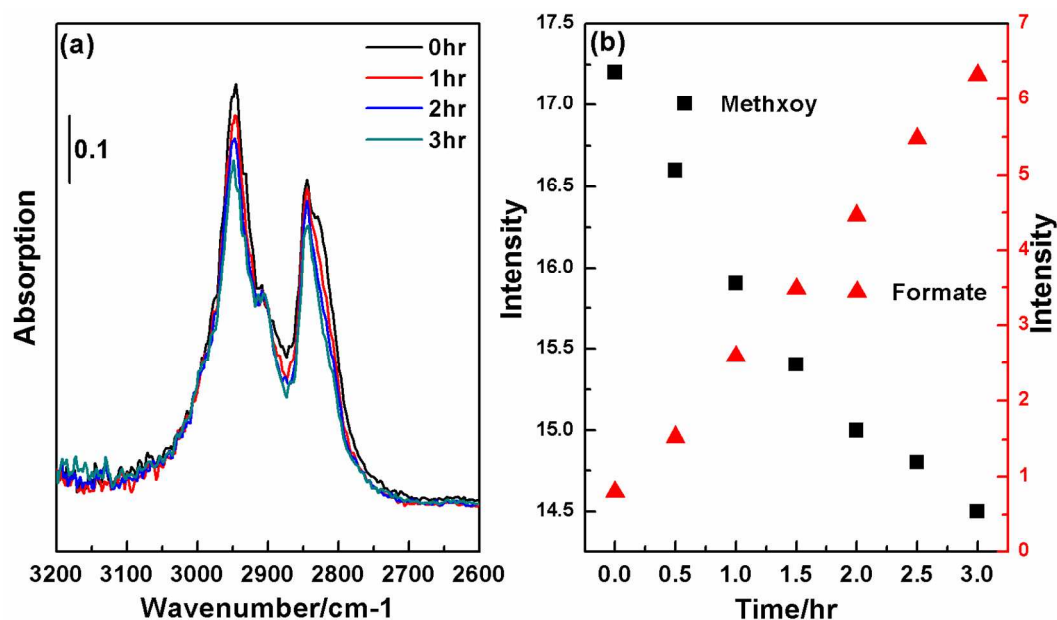

Figure S7. (a) *In-situ* FTIR spectra in the methoxy region ( $3200\text{--}2600\text{ cm}^{-1}$ ) after methanol oxidation on 1c  $\text{VO}_x/\text{Al}_2\text{O}_3$  (0.48 wt%) as a function of reaction time at  $200\text{ }^\circ\text{C}$ ; (b) Time profile of the intensities of the formate and methoxy absorptions. The indicated methoxy intensity was obtained from an integration of a portion of a deconvolution of the C-H stretching region. The peak that was integrated is shown in Figure S3 and is centered at  $2940\text{ cm}^{-1}$ .



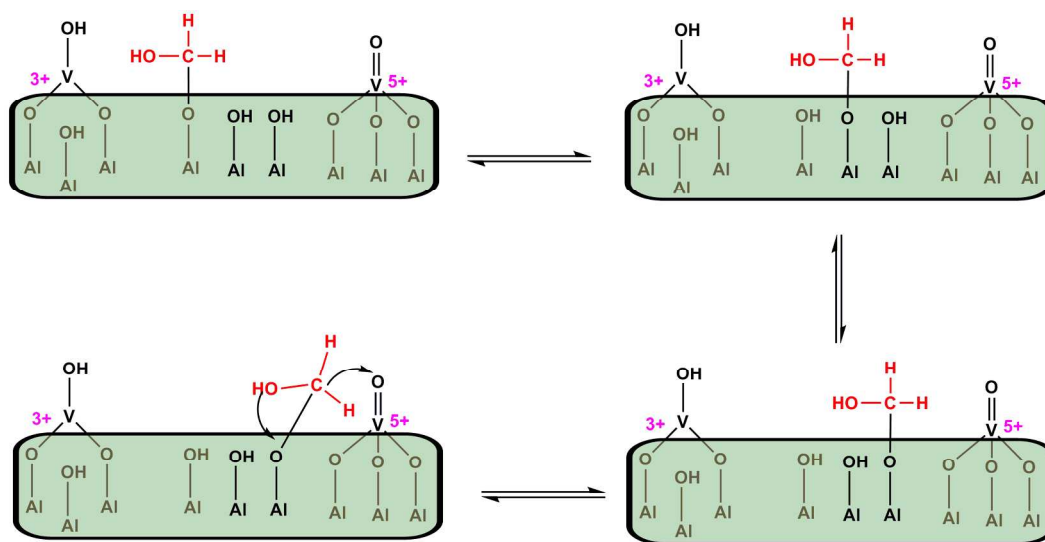

Scheme S1. A schematic of a proposed mechanism for the migration of hydroxymethyl on the surface of 1c  $\text{VO}_x/\theta\text{-Al}_2\text{O}_3$  (0.48 wt%)
